# Supplementary material for: A Kettle of Fish: A Review of the Scientific Literature for Evidence of Fish Sentience
Source: MDPI journal article supplement (doi:10.3390/ani12091182), 2022-05-05
Supplement: s1 [file s1]

Supplementary File S1. The keywords used in the study, including details of their source, valence and whether they returned suitable results.

|  | <b>Keyword</b>      | <b>Origin</b>                                                                       | <b>Valence</b> | <b>Returned results</b> |
|--|---------------------|-------------------------------------------------------------------------------------|----------------|-------------------------|
|  | Apprehension        | <b>Plutchik (1981), Parrot (2001), Proctor <i>et al.</i> (2013)</b>                 | Negative       | <b>No</b>               |
|  | Annoyance           | <b>Plutchik (1981), Parrot (2001), HUMAINE (2006), Proctor <i>et al.</i> (2013)</b> | Negative       | <b>No</b>               |
|  | Anticipation        | <b>Plutchik (1981), Proctor <i>et al.</i> (2013)</b>                                | Neutral        | <b>Yes</b>              |
|  | Anger               | <b>Plutchik (1981), Parrot (2001), HUMAINE (2006), Proctor <i>et al.</i> (2013)</b> | Negative       | <b>No</b>               |
|  | Arousal (emotional) | <b>Parrot (2001), Proctor <i>et al.</i> (2013)</b>                                  | Neutral        | <b>Yes</b>              |
|  | Agitation           | <b>Parrot (2001), Proctor <i>et al.</i> (2013)</b>                                  | Negative       | <b>No</b>               |
|  | Anxiety             | <b>Parrot (2001), HUMAINE (2006), Proctor <i>et al.</i> (2013)</b>                  | Negative       | <b>Yes</b>              |
|  | Altruism            | <b>Proctor <i>et al.</i> (2013)</b>                                                 | Positive       | <b>Yes</b>              |
|  | Affective State     | <b>Proctor <i>et al.</i> (2013)</b>                                                 | Neutral        | <b>Yes</b>              |
|  | Contentment         | <b>Parrot (2001), Proctor <i>et al.</i> (2013)</b>                                  | Positive       | <b>No</b>               |
|  | Conscious           | <b>Proctor <i>et al.</i> (2013)</b>                                                 | Neutral        | <b>No</b>               |
|  | Cognitive bias      | <b>Lambert <i>et al.</i> (2019)</b>                                                 | Neutral        | <b>No</b>               |
|  | Disgust             | <b>Plutchik (1981), Parrot (2001), HUMAINE (2006), Proctor <i>et al.</i> (2013)</b> | Negative       | <b>No</b>               |
|  | Dislike             | <b>Parrot (2001), Proctor <i>et al.</i> (2013)</b>                                  | Negative       | <b>Yes</b>              |
|  | Depression          | <b>Parrot (2001), Proctor <i>et al.</i> (2013)</b>                                  | Negative       | <b>Yes</b>              |
|  | Dismay              | <b>Parrot (2001), Proctor <i>et al.</i> (2013)</b>                                  | Negative       | <b>No</b>               |
|  | Distress            | <b>Parrot (2001), Proctor <i>et al.</i> (2013)</b>                                  | Negative       | <b>Yes</b>              |

|          |                |                                                              |          |     |
|----------|----------------|--------------------------------------------------------------|----------|-----|
|          | Excitement     | Parrot (2001), Proctor <i>et al.</i> (2013)                  | Positive | No  |
|          | Eagerness      | Parrot (2001), Proctor <i>et al.</i> (2013)                  | Positive | Yes |
|          | Emotion        | Proctor <i>et al.</i> (2013)                                 | Neutral  | Yes |
| <b>F</b> | Fear           | Plutchik (1981), Parrot (2001), HUMAINE (2006)               | Negative | Yes |
|          | Frustration    | Plutchik (1981), Parrot (2001), HUMAINE (2006)               | Negative | Yes |
| <b>G</b> | Grief          | Plutchik (1981), Parrot (2001), Proctor <i>et al.</i> (2013) | Negative | No  |
|          | Hostility      | Parrot (2001), Proctor <i>et al.</i> (2013)                  | Negative | Yes |
|          | Helplessness   | HUMAINE (2006), Proctor <i>et al.</i> (2013)                 | Negative | Yes |
|          | Intentionality | New                                                          | Neutral  | Yes |
| <b>J</b> | Joy            | Parrot (2001), Plutchik (1981), Proctor <i>et al.</i> (2013) | Positive | No  |
|          | Judgement bias | Lambert <i>et al.</i> (2019)                                 | Neutral  | No  |
|          | Nervousness    | Parrot (2001), Proctor <i>et al.</i> (2013)                  | Negative | No  |
| <b>O</b> | Optimism       | Parrot (2001), Plutchik (1981), Proctor <i>et al.</i> (2013) | Positive | No  |
|          | Pleasure       | Parrot (2001), Proctor <i>et al.</i> (2013)                  | Positive | No  |
|          | Panic          | Parrot (2001), Proctor <i>et al.</i> (2013)                  | Negative | Yes |
|          | Pessimism      | Proctor <i>et al.</i> (2013)                                 | Negative | No  |
|          | Play           | Proctor <i>et al.</i> (2013)                                 | Positive | No  |
|          | Pain           | Proctor <i>et al.</i> (2013)                                 | Negative | Yes |
|          | Prosocial      | New                                                          | Neutral  | No  |
|          | Rationality    | Proctor <i>et al.</i> (2013)                                 | Neutral  | No  |
| <b>S</b> | Surprise       | Plutchik (1981), Proctor <i>et al.</i> (2013)                | Neutral  | No  |

|  |           |                                                    |          |            |
|--|-----------|----------------------------------------------------|----------|------------|
|  | Sentience | <b>Proctor <i>et al.</i> (2013)</b>                | Neutral  | <b>Yes</b> |
|  | Suffering | <b>Parrot (2001), Proctor <i>et al.</i> (2013)</b> | Negative | <b>No</b>  |
|  | Stress    | <b>Proctor <i>et al.</i> (2013)</b>                | Negative | <b>Yes</b> |
|  | Tenseness | <b>Parrot (2001), Proctor <i>et al.</i> (2013)</b> | Negative | <b>No</b>  |
|  | Valence   | <b>Proctor <i>et al.</i> (2013)</b>                | Neutral  | <b>No</b>  |
